# Supplementary material
Source: PubMed Central journal article supplement (PMC3983322)
Supplement: es404568a_si_001.pdf [file es404568a_si_001.pdf]

## **Supporting Information:**

### ***In Silico Analysis of the Conservation of Human Toxicity and Endocrine Disruption Targets in Aquatic Species.***

**Fiona M. McRobb, Virginia Sahagún, Irina Kufareva and Ruben Abagyan\***

*Skaggs School of Pharmacy and Pharmaceutical Sciences, University of California San Diego, La Jolla, CA*

\*Corresponding author: rabagyan@ucsd.edu

|                                                                                                                                                                      |           |
|----------------------------------------------------------------------------------------------------------------------------------------------------------------------|-----------|
| <b>Figure S1.</b> The average sequence similarity of orthologs compared to the corresponding human toxicity target. ....                                             | <b>2</b>  |
| <b>Figure S2.</b> Sequence similarity and sequence identity for the 28 toxicity target proteins, including rat and mouse sequences. ....                             | <b>3</b>  |
| <b>Figure S3. a.</b> Heat-map of the sequence similarity of the two $\beta_2$ AR sub-pockets and images of subpockets. ....                                          | <b>4</b>  |
| <b>Figure S4.</b> Heat-maps of the sequence similarity and conservation of remaining proteins. ....                                                                  | <b>5</b>  |
| <b>Figure S5. a.</b> Heat-map of the sequence similarity of the six out of nine of the ER $\alpha$ sub-pockets and images of subpockets. ....                        | <b>6</b>  |
| <b>Figure S6. a.</b> Heat-map of the sequence similarity of the four AR sub-pockets and images of subpockets. ....                                                   | <b>7</b>  |
| <b>Figure S7. a.</b> Heat-map of the sequence similarity of the five PXR sub-pockets and images of subpockets. ....                                                  | <b>8</b>  |
| <b>Figure S8. a.</b> Heat-map of the sequence similarity of the PPAR $\gamma$ sub-pockets and images of subpockets. ....                                             | <b>9</b>  |
| <b>Figure S9. a.</b> Heat-map of the sequence similarity of the six CYP3A4 sub-pockets (number of identical sub-pocket residues/number of sub-pocket residues). .... | <b>10</b> |

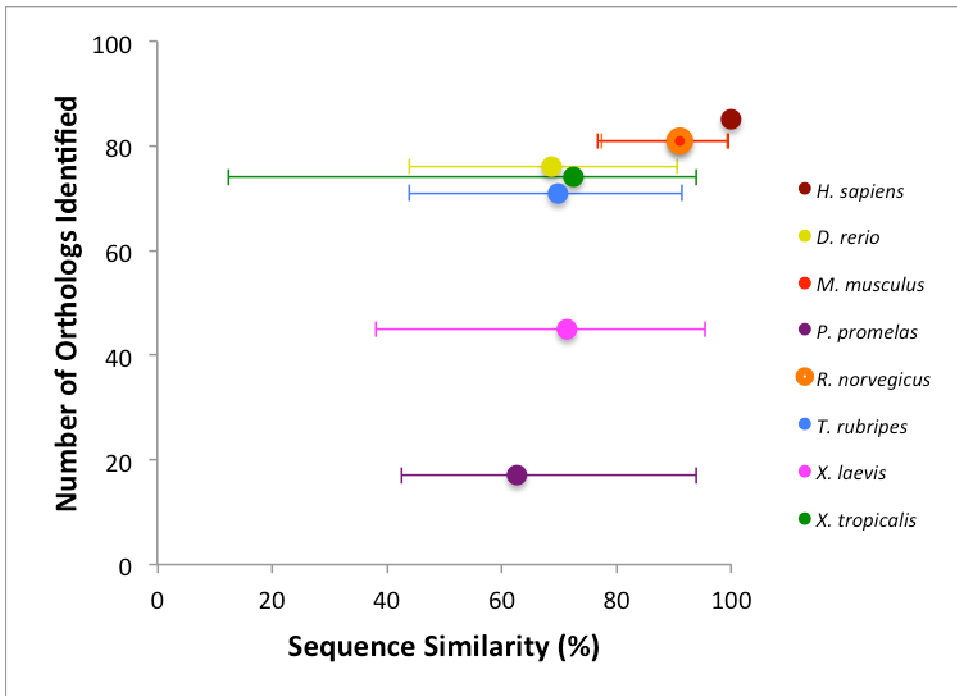

**Figure S1.** The average sequence similarity of orthologs compared to the corresponding human toxicity target (minimum and maximum similarities are indicated by the error bars).

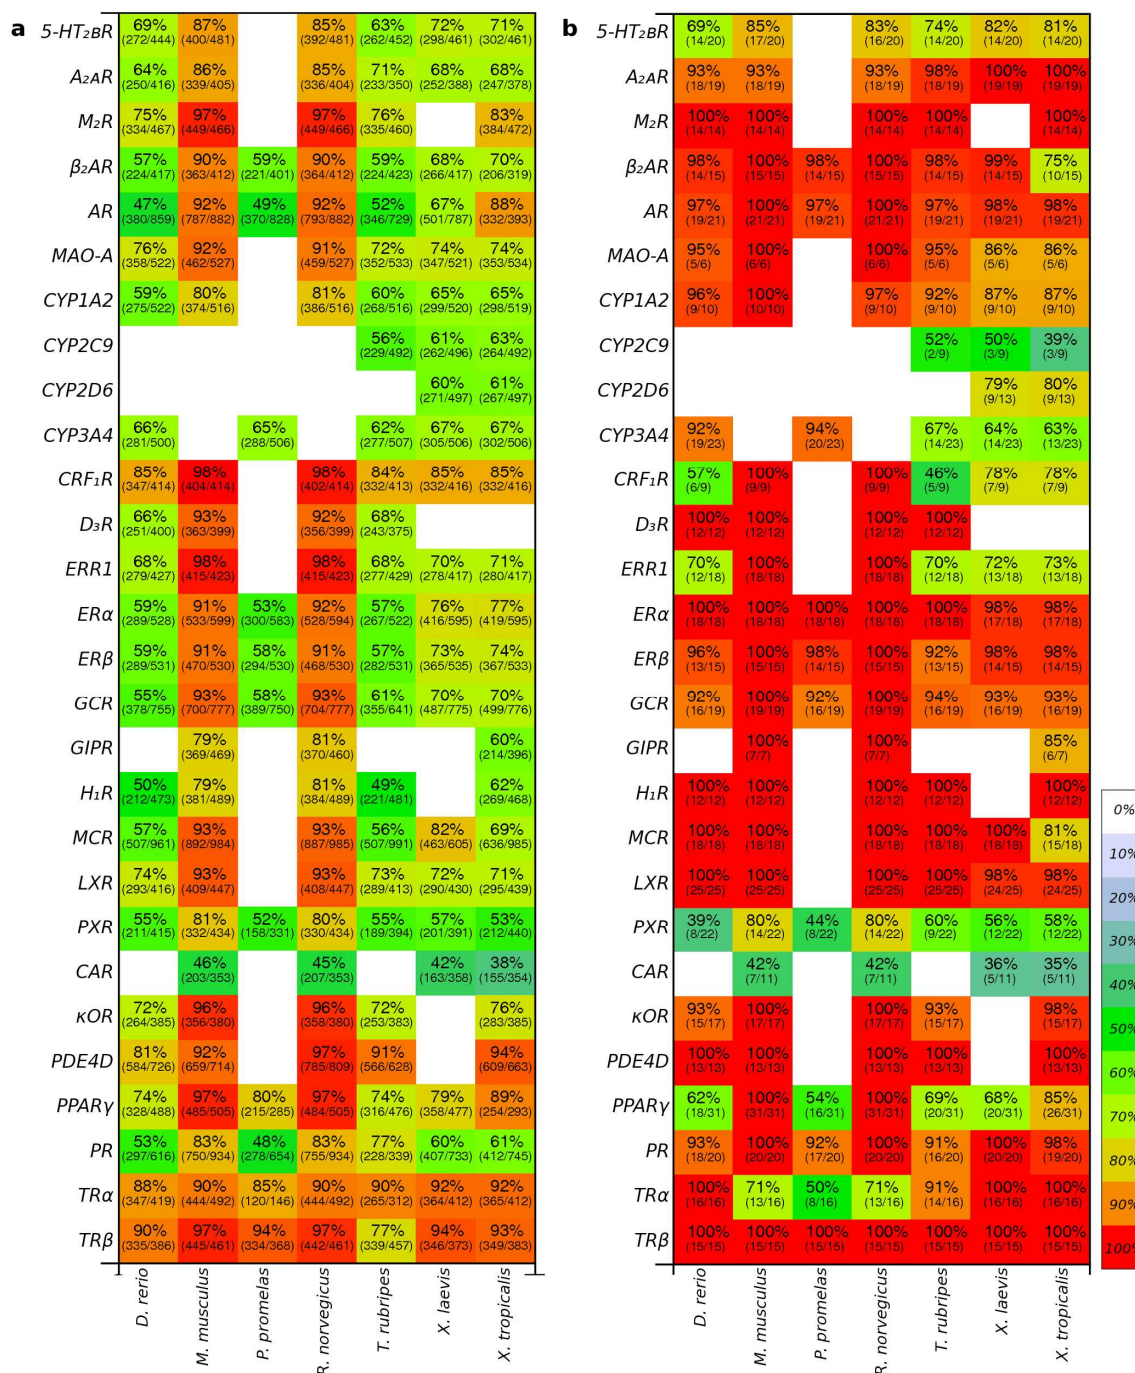

**Figure S2.** Sequence similarity (percentage and color) and sequence identity (number of identical residues/number of aligned residues is shown in parenthesis) for the 28 toxicity target proteins of **a.** the full sequence and **b.** the ligand-contact residues conserved for 80% of the co-crystallized ligands. White spaces indicate that no ortholog was identified (often due to an incomplete proteome).

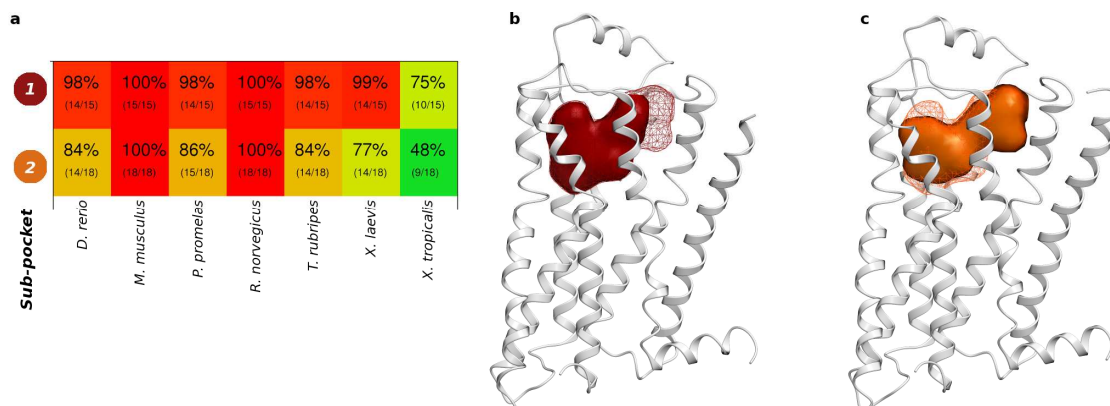

**Figure S3. a.** Heat-map of the sequence similarity of the two  $\beta_2$ AR sub-pockets (number of identical sub-pocket residues/number of sub-pocket residues). **b.-c.**  $\beta_2$ AR crystal structures (grey ribbons), all co-crystallized ligands (mesh) and sub-pockets 1-2 (solid surface).

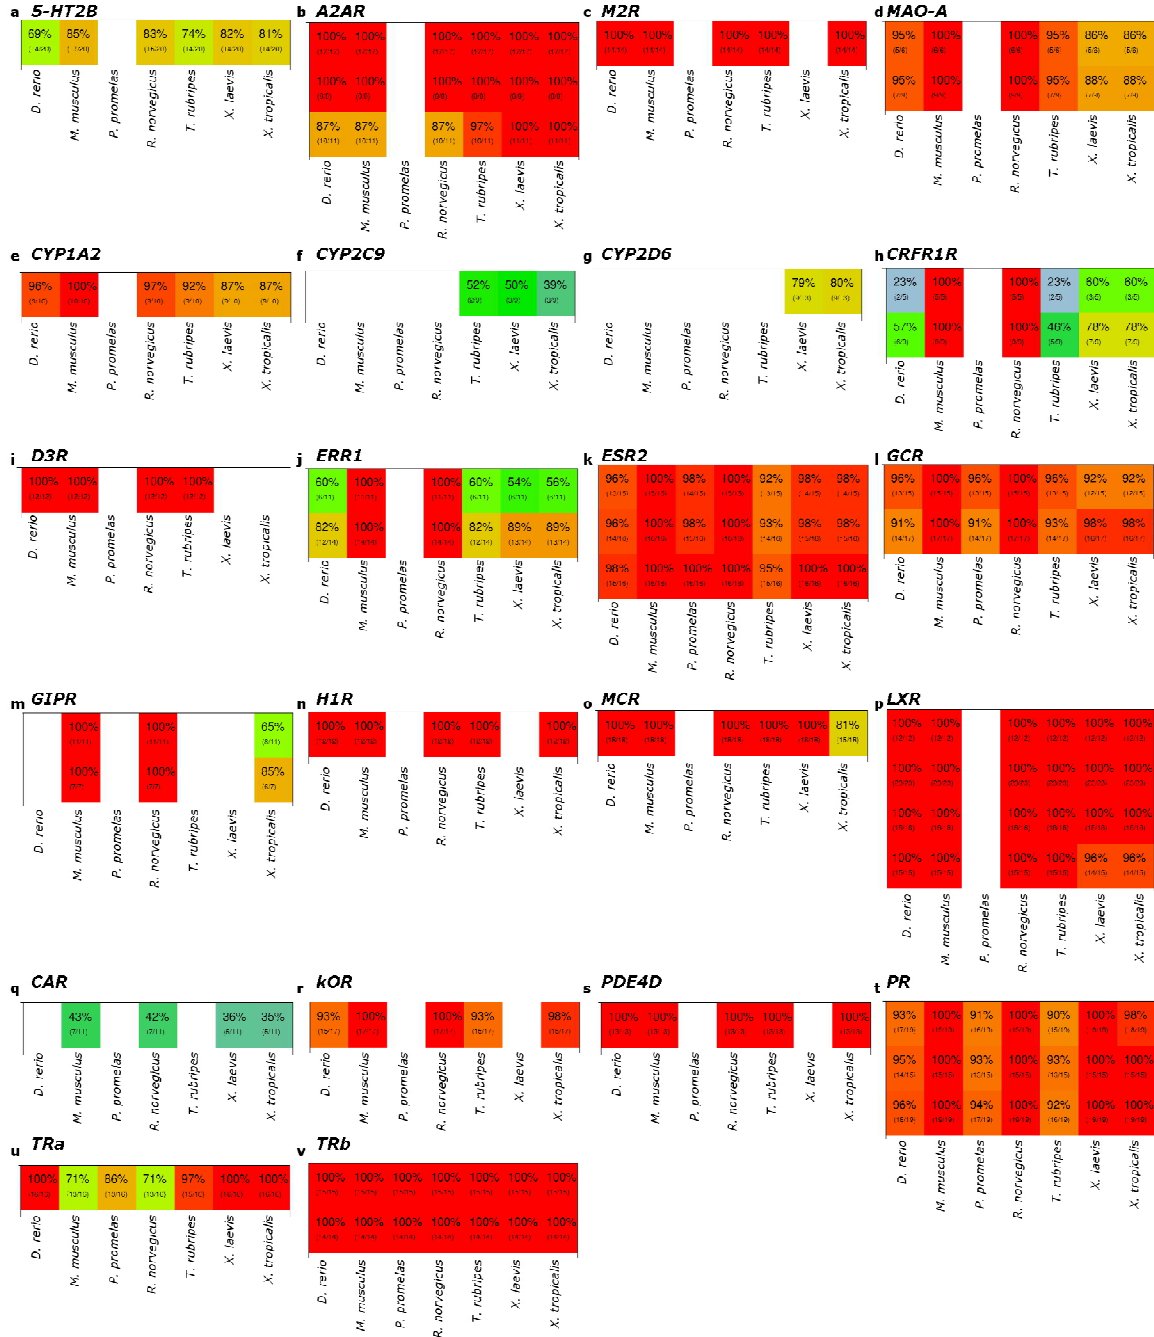

**Figure S4.** Heat-maps of the sequence similarity and conservation. White spaces indicate that no ortholog was identified (often due to incomplete genome sequencing).

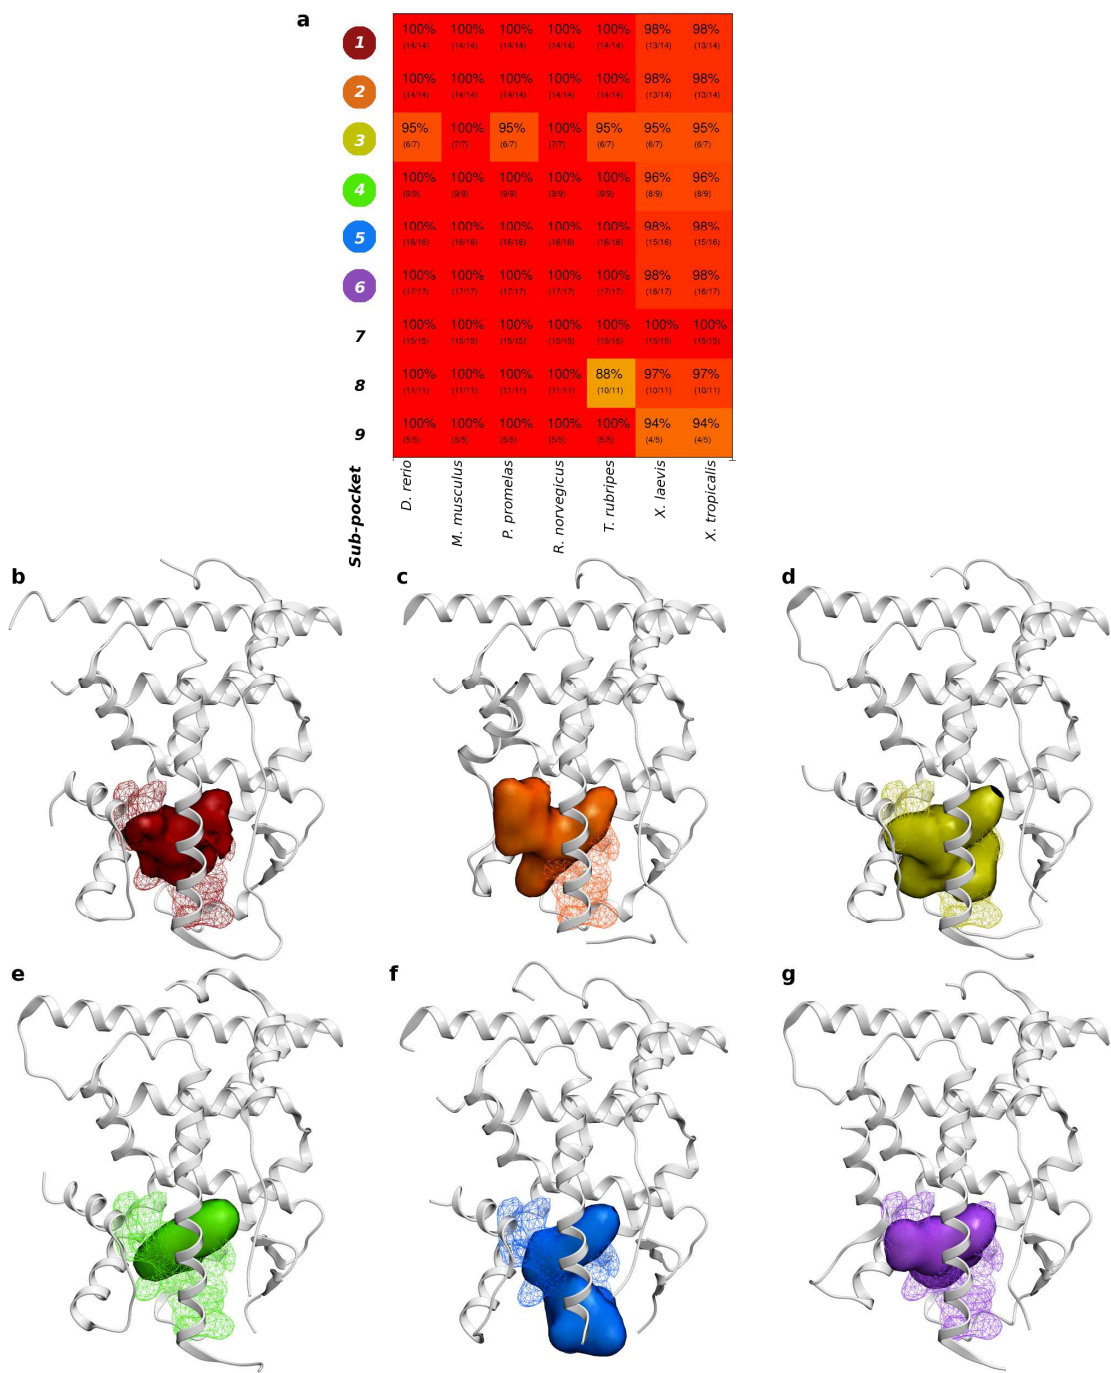

**Figure S5. a.** Heat-map of the sequence similarity of the six out of nine of the ER $\alpha$  sub-pockets (number of identical sub-pocket residues/number of sub-pocket residues). **b.-g.** ER $\alpha$  crystal structures (grey ribbons), all co-crystallized ligands (mesh) and sub-pockets 1-6 (solid surface).



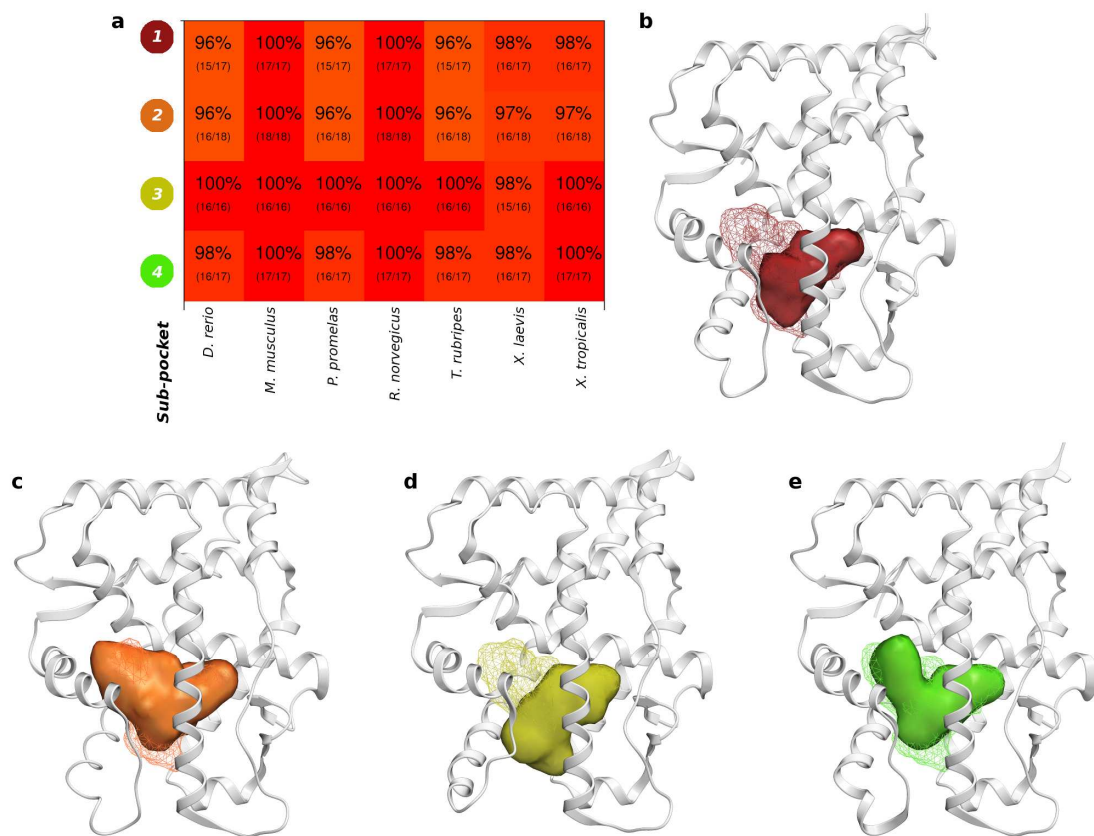

**Figure S6. a.** Heat-map of the sequence similarity of the four AR sub-pockets (number of identical sub-pocket residues/number of sub-pocket residues). **b.-e.** AR crystal structures (grey ribbons), all co-crystallized ligands (mesh) and sub-pockets 1-4 (solid surface).

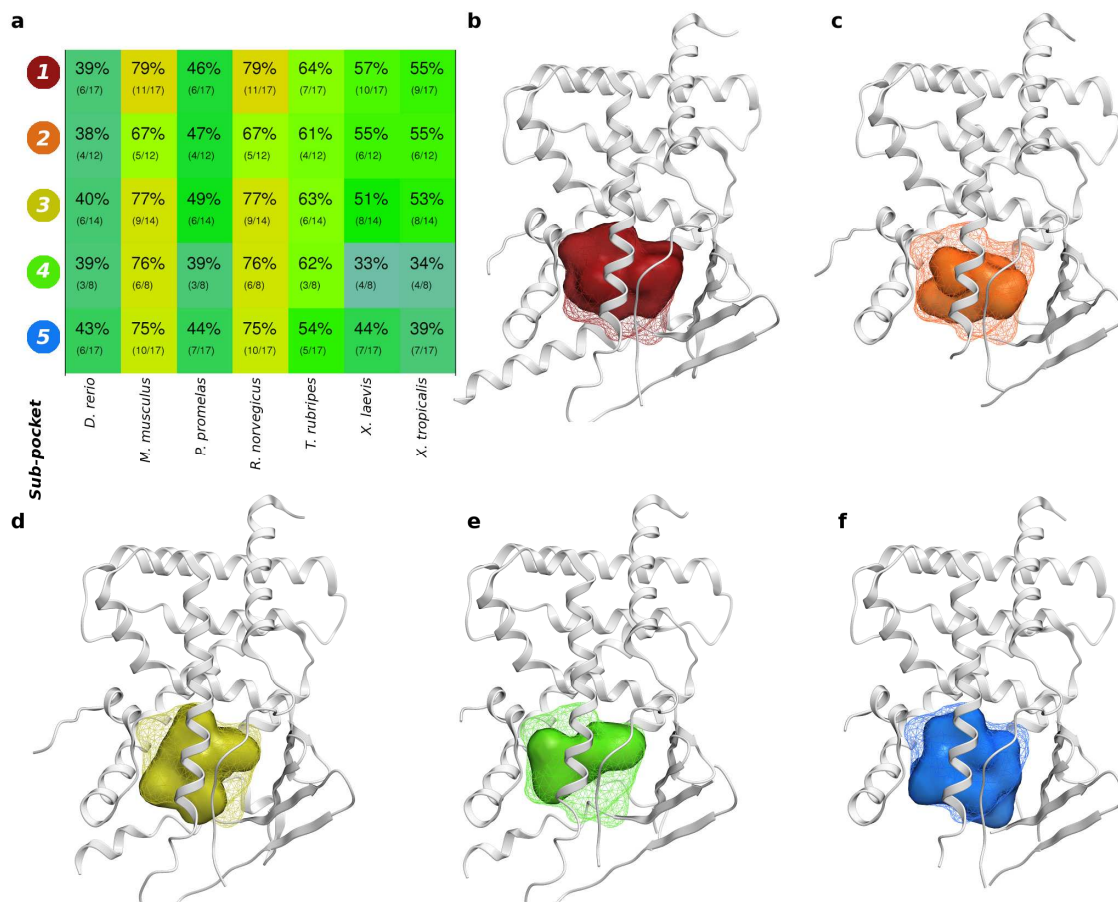

**Figure S7. a.** Heat-map of the sequence similarity of the five PXR sub-pockets (number of identical sub-pocket residues/number of sub-pocket residues). **b.-f.** PXR crystal structures (grey ribbons), all co-crystallized ligands (mesh) and sub-pockets 1-5 (solid surface).



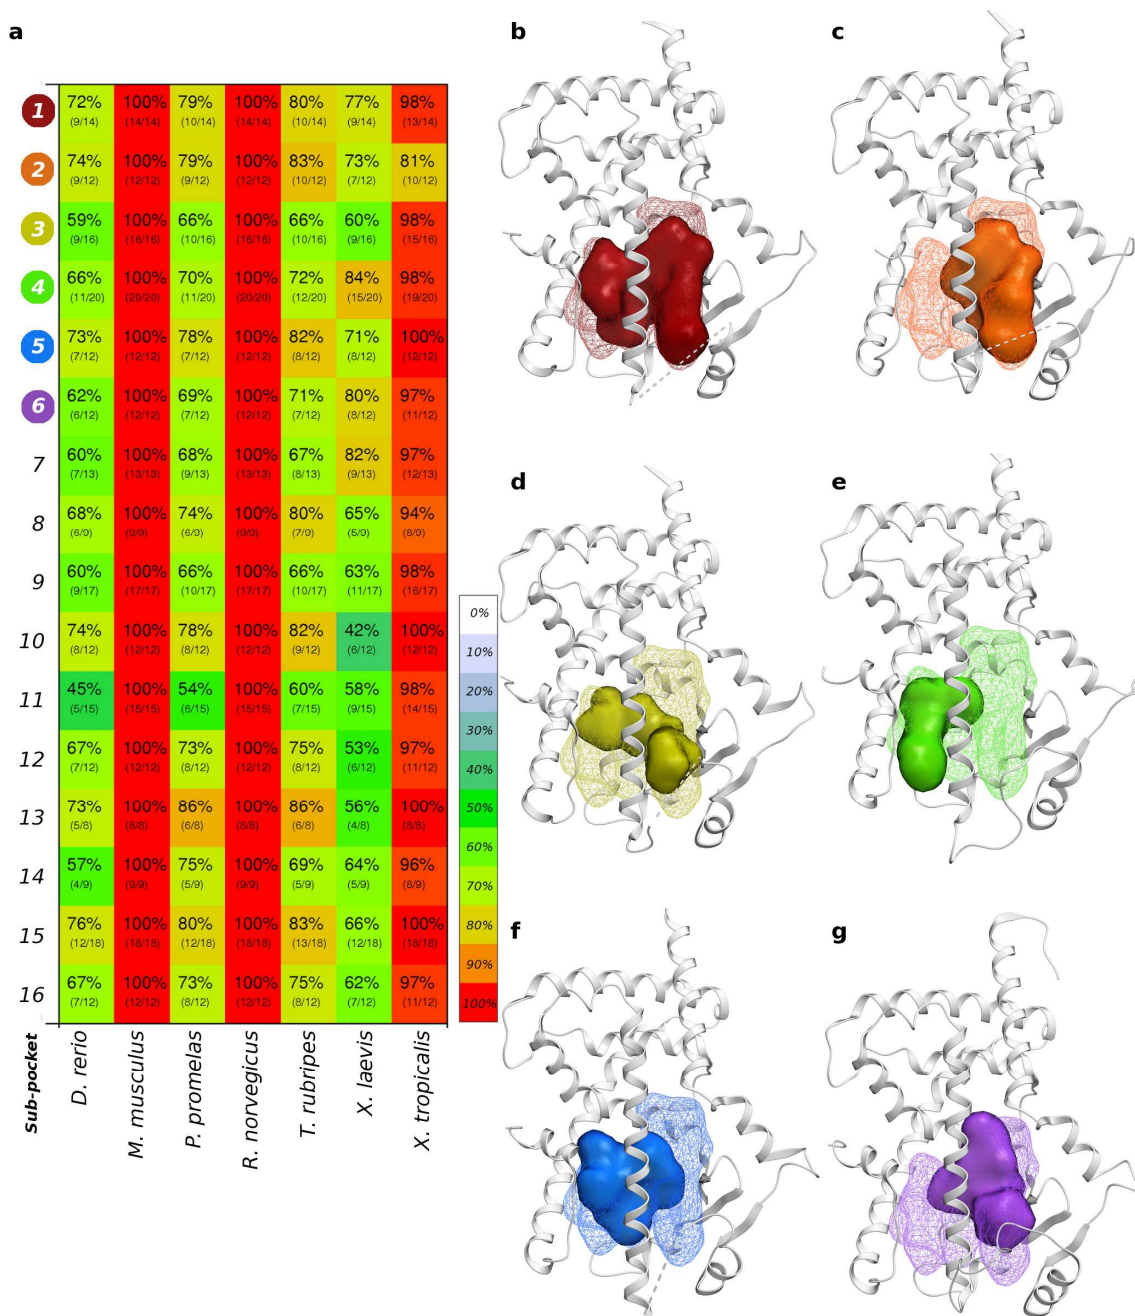

**Figure S8. a.** Sequence similarity (percentage and color) and sequence identity (number of identical residues/number of aligned residues is shown in parenthesis) for the 16 PPAR $\gamma$  sub-pockets. **b-g.** Representative PPAR $\gamma$  crystal structures (grey ribbons), all co-crystallized ligands (mesh) and sub-pocket (solid surface); **b.** agonist sub-pocket 1, **c.** partial agonist sub-pocket 2, **d.** partial agonist sub-pocket 3, **e.** partial agonist sub-pocket 4, **f.** partial agonist sub-pocket 5 and **g.** partial agonist sub-pocket 6.

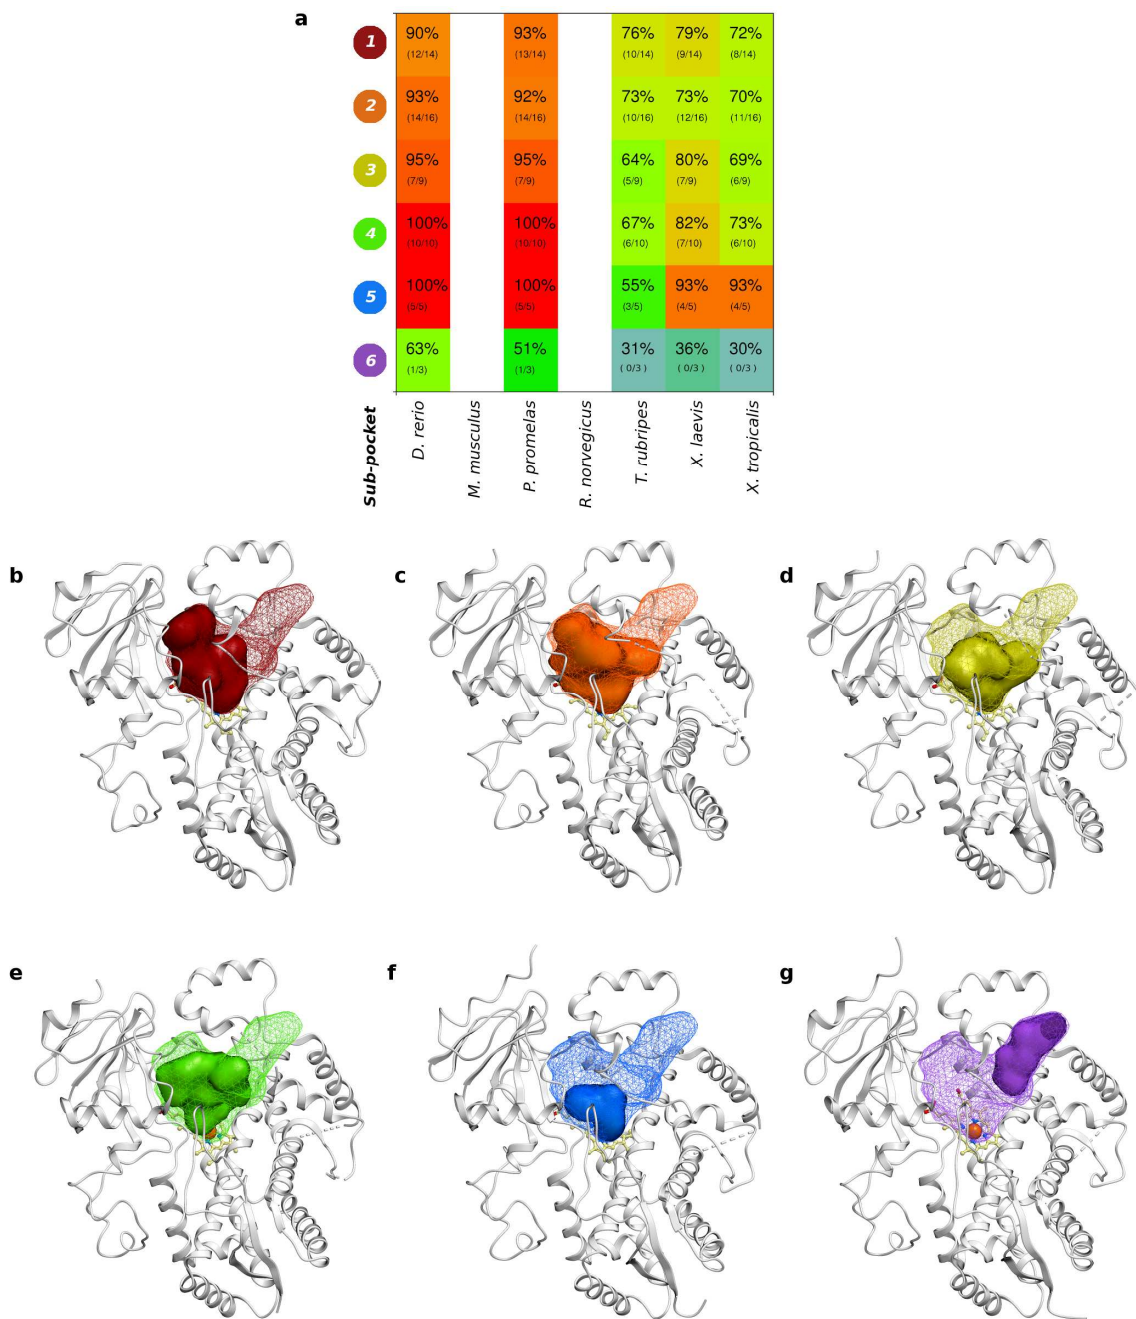

**Figure S9. a.** Heat-map of the sequence similarity of the six CYP3A4 sub-pockets (number of identical sub-pocket residues/number of sub-pocket residues). **b.-g.** CYP3A4 crystal structures (grey ribbons), all co-crystallized ligands (mesh), sub-pockets 1-6 (solid surface) and the heme co-factor shown as sticks.
